# Supplementary material
Source: PubMed Central journal article supplement (PMC6277152)
Supplement: 10.1194_M082180_jlr.M082180-1.pdf [file 10.1194_M082180_jlr.M082180-1.pdf]

## Establishment of obese mice model

S1

A

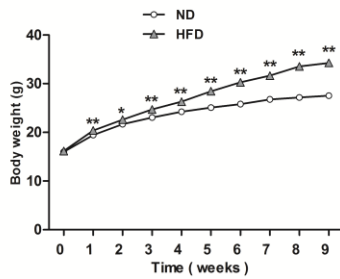

B

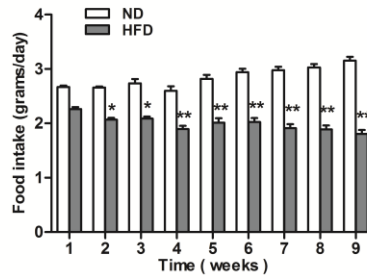

C

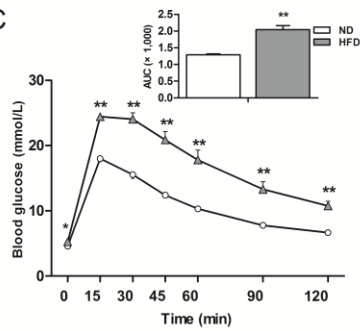

D

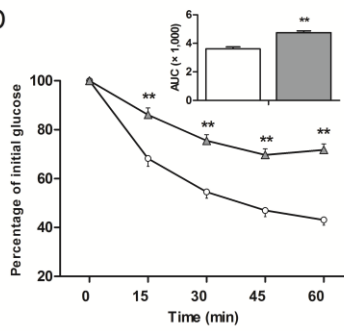

**Supplemental Figure S1.** Body weight changes (A) and feed intake per day (B) of ND group mice (n = 8) or HFD diet group mice (n = 16) for fed different diets during 9 weeks period. Glucose tolerance (C) and insulin tolerance (D) in normal mice fed ND and obese mice fed HFD (n = 8 per group), asterisk (\* or \*\*) denotes a significant difference between ND group and HFD group. Values are expressed as mean  $\pm$  SEM. \* mean  $p < 0.05$ , \*\* mean  $p < 0.01$ . Error bars indicate SEM.
